# Supplementary material
Source: ML conference proceedings conference paper supplement (https://openaccess.thecvf.com/content/WACV_2020/html/Taha_Boosting_Standard_Classification_WACV_2020_paper.html)
Supplement: Supplementary file 1 [file Taha_Boosting_Standard_Classification_WACV_2020_supplemental.pdf]

# Boosting Standard Classification Architectures Through a Ranking Regularizer

Supplementary material

Ahmed Taha<sup>1</sup> Yi-Ting Chen<sup>2</sup> Teruhisa Misu<sup>2</sup> Abhinav Shrivastava<sup>1</sup> Larry Davis<sup>1</sup>  
<sup>1</sup>University of Maryland, College Park    <sup>2</sup>Honda Research Institute, USA

## 1. Supplementary Material

The next subsections provide more details about our architecture and training procedure’s technicalities. Further quantitative evaluations on fine-grained visual recognition (FGVR) are presented. Finally, we demonstrate the training procedure for the Honda Research Institute Driving Dataset.

### 1.1. Fine-Grained Visual Recognition

Figure 2 in the main paper presents our two-head architecture. The pre-logit layer  $x$  supports the softmax loss. Similarly, triplet loss utilizes  $h$ , where  $x = \text{pool}(h)$ . The network outputs, both logits and embedding, are formulated as follows.

$$\begin{aligned} \text{logits} &= W_{\text{logits}} * \text{flat}(x) & (1) \\ \text{embedding} &= W_{\text{emb}} * \text{flat}(h). & (2) \end{aligned}$$

Orderless pooling, like averaging, reduces  $h$  dimensionality but loses spatial information. For example, in DenseNet161,  $h \in R^{7 \times 7 \times 2208}$  while  $x \in R^{1 \times 1 \times 2208}$ . Thus,  $W_{\text{emb}}$  employs  $h$ , instead of  $x$ , to improve feature embedding. Figure S1 illustrates how  $h$  provides a finer control level while learning  $W_{\text{emb}}$ .

Figure S2 shows a t-SNE visualization for Flowers-102 embedding using 50 random classes, 20 samples per class. In the main paper, the inferior performance of triplet loss with hard-mining is associated with convergence to bad local minima, *i.e.*, a collapsed model (*i.e.*,  $f(x) = 0$ ) [7]. To examine such assumption, we train a DenseNet for 400K iterations on Stanford Dogs. This large number of iterations increases the chances of a model collapse. Figure S3 presents the performance on the test split after every 50K iterations. Triplet loss with hard-mining is evaluated with both soft and hard margin. Soft margin applies the softplus function  $\ln(1 + \exp(\bullet))$  while hard margin uses a fixed margin  $m = 0.2$ . The triplet loss with hard-mining deteriorates with soft margin when trained for a large number of iterations. Hard-mining with hard margin is more robust. We found similar behavior on other datasets like Stanford Cars and Aircrafts datasets.

Table 5 in the main paper presents a quantitative analysis for the feature embedding learned by the second head

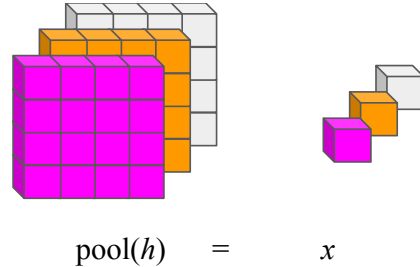

Figure S1: Orderless pooling reduces dimensionality but loses features spatial information.

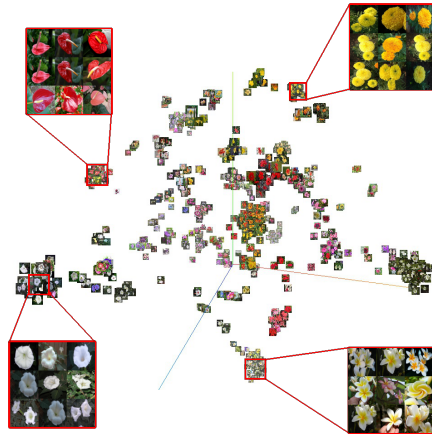

Figure S2: t-SNE visualization for Flowers-102 embedding using 50 random classes, 20 samples per class. Best viewed in color.

in our proposed architecture. Similarly, Table S1 presents feature embedding quantitative analysis using the architecture penultimate layer, *i.e.*, layer  $x$  (Figure 2 in the main paper). This layer is present in both our proposed two-head and single-head (vanilla softmax) architecture. Similar to Table 5, the triplet loss embedding is superior to the softmax embedding. Triplet loss with hard-mining achieves the best results on ResNet-50 but degrades on Inception-V4 trained for 80K iterations. Center loss achieves good results with DenseNet161 on NABirds but generally fluctuates and suf-

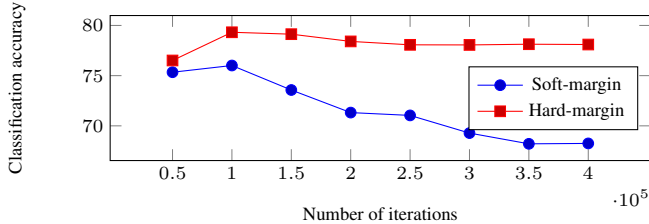

Figure S3: Model collapse study by training DenseNet161 for 400K iterations. Triplet loss with hard-mining evaluated with soft and hard margins.

fers with Inception-V4. Triplet loss with semi-hard margin achieves sub-optimal embedding but maintains the highest stability compared to center and hard-mining approaches.

Figure S4 graphically summarizes Table S1. It provides a comparative embedding evaluation between the single-head softmax versus the two-head with semi-hard triplet loss using recall@1 metric. Triplet loss improvements, over the softmax model, are reported as ( $\Delta$ ). The Flowers-102 dataset has the smallest training split with 1020 images only. With this limited data, the head-two architecture achieves marginal improvement if any.

Table S2 compares our proposed two-head architecture, using DenseNet161, with state-of-the-art approaches on the five FGVR datasets. Our two-head architecture with the semi-hard triplet loss regularizer achieves competitive results.

## 1.2. Autonomous Car Driving

The Honda Research Institute Driving Dataset (HDD) contains 137 sessions  $S$ . Each session  $S_i$  represents a navigation task performed by a driver.  $S$  is divided into 93, 5, and 36 sessions for training, validation and testing splits respectively. Three sessions are removed for missing annotations. HDD has four annotation layers to study the drivers' actions: (1) Goal-oriented, (2) stimulus-driven, (3) cause and (4) attention. The **Goal-oriented** layer, utilized in our experiments, defines drivers' actions to reach their destinations, e.g., *left-turn* and *intersection passing*. Ramanishka *et al.* [6] provides further details for the other three annotation layers.

Triplet loss mini-batches require both positive and negative samples. The FGVR datasets have uniform class distribution. Thus, training batches' construction is straightforward by sampling random classes and their corresponding images as outlined in the main paper. On the other hand, HDD suffers class imbalance. A different batch construction procedure is required.

Algorithm 1 outlines our training procedure. First,  $N_B$  mini-batches are constructed, each containing  $b$  random actions. The batches' embeddings are computed using  $N_B$

|                    |         | NMI          | R@1          | R@4          | R@8          | R@16         |
|--------------------|---------|--------------|--------------|--------------|--------------|--------------|
| Cars - ResNet      | Vanilla | 0.791        | 77.88        | 91.17        | 94.65        | 96.9         |
|                    | CNTR    | 0.756        | 77.98        | 91.12        | 94.58        | 96.78        |
|                    | SEMI    | 0.823        | 81.41        | 92.79        | 95.91        | 97.74        |
|                    | HARD    | <b>0.853</b> | <b>85.31</b> | <b>94.30</b> | <b>96.82</b> | <b>98.07</b> |
| Flowers - ResNet   | Vanilla | 0.800        | 88.76        | 95.51        | 97.27        | <b>98.49</b> |
|                    | CNTR    | 0.807        | 88.79        | 95.58        | 97.32        | <b>98.49</b> |
|                    | SEMI    | <b>0.818</b> | 89.48        | <b>95.82</b> | <b>97.37</b> | 98.37        |
|                    | HARD    | 0.742        | <b>90.78</b> | 95.56        | 96.93        | 97.98        |
| Dogs - ResNet      | Vanilla | 0.587        | 51.62        | 74.22        | 83.02        | 89.76        |
|                    | CNTR    | 0.526        | 48.74        | 71.90        | 80.92        | 87.81        |
|                    | SEMI    | 0.621        | 54.18        | 76.39        | 84.50        | 91.10        |
|                    | HARD    | <b>0.684</b> | <b>60.37</b> | <b>80.34</b> | <b>87.33</b> | <b>92.26</b> |
| Aircrafts - ResNet | Vanilla | 0.756        | 73.42        | 87.88        | 92.26        | 94.90        |
|                    | CNTR    | 0.677        | 70.84        | 85.84        | 90.79        | 93.91        |
|                    | SEMI    | 0.792        | 77.26        | 89.65        | 93.07        | 95.29        |
|                    | HARD    | <b>0.829</b> | <b>84.01</b> | <b>91.63</b> | <b>94.21</b> | <b>95.65</b> |
| NABirds - ResNet   | Vanilla | 0.669        | 50.70        | 71.20        | 79.48        | 85.80        |
|                    | CNTR    | 0.623        | 47.40        | 68.18        | 76.56        | 83.33        |
|                    | SEMI    | 0.657        | 50.05        | 70.83        | 78.84        | 85.52        |
|                    | HARD    | <b>0.723</b> | <b>55.85</b> | <b>75.81</b> | <b>83.26</b> | <b>88.67</b> |
| Cars - Inc-V4      | Vanilla | 0.660        | 72.47        | 86.77        | 90.55        | 93.55        |
|                    | CNTR    | 0.496        | 61.55        | 79.09        | 85.09        | 89.69        |
|                    | SEMI    | <b>0.788</b> | <b>81.46</b> | <b>92.14</b> | <b>94.64</b> | <b>96.37</b> |
|                    | HARD    | 0.566        | 63.70        | 82.04        | 87.54        | 91.42        |
| Flowers - Inc-V4   | Vanilla | 0.778        | 90.54        | 96.21        | 97.63        | 98.70        |
|                    | CNTR    | 0.707        | 85.62        | 93.74        | 95.95        | 97.56        |
|                    | SEMI    | <b>0.801</b> | 89.58        | 95.23        | 96.91        | 97.84        |
|                    | HARD    | 0.731        | <b>92.68</b> | <b>96.21</b> | <b>97.27</b> | <b>98.32</b> |
| Dogs - Inc-V4      | Vanilla | 0.421        | 41.11        | 62.97        | 72.59        | 81.13        |
|                    | CNTR    | 0.453        | <b>57.13</b> | 68.32        | 72.35        | 76.90        |
|                    | SEMI    | <b>0.609</b> | 55.03        | <b>76.50</b> | <b>84.44</b> | <b>90.23</b> |
|                    | HARD    | 0.330        | 33.89        | 54.28        | 65.06        | 74.98        |
| Aircrafts - Inc-V4 | Vanilla | 0.680        | 69.79        | 85.18        | 89.23        | 91.93        |
|                    | CNTR    | 0.546        | 61.60        | 79.75        | 85.33        | 89.53        |
|                    | SEMI    | 0.751        | 78.13        | 89.20        | 91.78        | 94.27        |
|                    | HARD    | <b>0.831</b> | <b>86.26</b> | <b>91.87</b> | <b>93.49</b> | <b>94.72</b> |
| NABirds - Inc-V4   | Vanilla | 0.546        | 41.03        | 60.11        | 68.88        | 76.71        |
|                    | CNTR    | 0.438        | 24.30        | 40.43        | 49.38        | 58.78        |
|                    | SEMI    | <b>0.638</b> | <b>52.42</b> | <b>72.38</b> | <b>79.57</b> | <b>85.60</b> |
|                    | HARD    | 0.433        | 23.68        | 38.95        | 47.48        | 57.10        |
| Cars - Dense       | Vanilla | 0.813        | 85.08        | 94.49        | 96.84        | 98.22        |
|                    | CNTR    | 0.787        | 87.39        | 93.17        | 94.64        | 95.97        |
|                    | SEMI    | 0.875        | 88.57        | 96.08        | 97.66        | 98.71        |
|                    | HARD    | <b>0.892</b> | <b>89.44</b> | <b>96.38</b> | <b>97.86</b> | <b>98.76</b> |
| Flowers - Dense    | Vanilla | 0.838        | 95.28        | 98.23        | 98.94        | 99.38        |
|                    | CNTR    | 0.812        | 95.87        | 98.16        | 98.75        | 99.22        |
|                    | SEMI    | 0.864        | 95.40        | 98.39        | 99.09        | 99.46        |
|                    | HARD    | <b>0.865</b> | <b>95.79</b> | <b>98.50</b> | <b>99.14</b> | <b>99.50</b> |
| Dogs - Dense       | Vanilla | 0.544        | 57.06        | 78.72        | 85.98        | 91.84        |
|                    | CNTR    | 0.720        | <b>70.96</b> | 84.00        | 88.19        | 91.96        |
|                    | SEMI    | 0.728        | 68.55        | 87.04        | 92.18        | 95.83        |
|                    | HARD    | <b>0.756</b> | 70.63        | <b>87.80</b> | <b>92.95</b> | <b>96.22</b> |
| Aircrafts - Dense  | Vanilla | 0.768        | 79.06        | 91.66        | 94.66        | 96.49        |
|                    | CNTR    | 0.792        | 86.20        | 91.63        | 93.16        | 94.48        |
|                    | SEMI    | 0.853        | 84.49        | <b>94.15</b> | 95.68        | <b>96.97</b> |
|                    | HARD    | <b>0.856</b> | <b>85.51</b> | 93.70        | <b>95.83</b> | 96.94        |
| NABirds - Dense    | Vanilla | 0.606        | 53.91        | 73.08        | 80.70        | 86.44        |
|                    | CNTR    | <b>0.818</b> | <b>75.28</b> | <b>86.88</b> | <b>90.85</b> | <b>93.69</b> |
|                    | SEMI    | 0.677        | 61.82        | 80.70        | 87.07        | 91.62        |
|                    | HARD    | 0.674        | 61.64        | 80.21        | 86.77        | 91.37        |

Table S1: Detailed feature embedding quantitative analysis across the five datasets using ResNet-50, Inception-V4 and DenseNet-161 architectures' penultimate layer  $x$ . Triplet with hard mining achieves superior embedding with ResNet-50 trained for 40K iterations. Semi-hard triplet is competitive and stable with Inception-V4 trained for 80K iterations. Center loss suffers a high instability.

feed forward passes. The  $2D$  matrix  $D_\phi$  stores the pairwise distance between the  $N_B \times b$  actions. All positive

| Flowers-102            |              | Aircrafts              |              | NABirds                   |              | Cars                   |              | Dogs                     |              |
|------------------------|--------------|------------------------|--------------|---------------------------|--------------|------------------------|--------------|--------------------------|--------------|
| Method                 | Acc          | Method                 | Acc          | Method                    | Acc          | Method                 | Acc          | Method                   | Acc          |
| Det.+Seg. [1]          | 80.66        | LRBP [2]               | 87.30        | Branson <i>et al.</i> [9] | 35.70        | Liu <i>et al.</i> [5]  | 86.80        | Zhang <i>et al.</i> [9]  | 80.43        |
| Overfeat [8]           | 86.80        | Liu <i>et al.</i> [4]  | 88.50        | Van <i>et al.</i> [3]     | 75.00        | Liu <i>et al.</i> [4]  | 92.00        | Krause <i>et al.</i> [3] | 80.60        |
| Softmax                | 92.56        | Softmax                | 89.13        | Softmax                   | 78.69        | Softmax                | 91.64        | <b>Softmax</b>           | <b>81.58</b> |
| <b>Two-Head (Semi)</b> | <b>93.65</b> | <b>Two-Head (Semi)</b> | <b>89.64</b> | <b>Two-Head (Semi)</b>    | <b>79.57</b> | <b>Two-Head (Semi)</b> | <b>92.36</b> | Two-Head (Semi)          | 80.89        |

Table S2: Quantitative evaluation on the five FGVR datasets using DenseNet161. Our two-head architecture with semi-hard triplet loss regularizer compares favorably with state-of-the-art results.

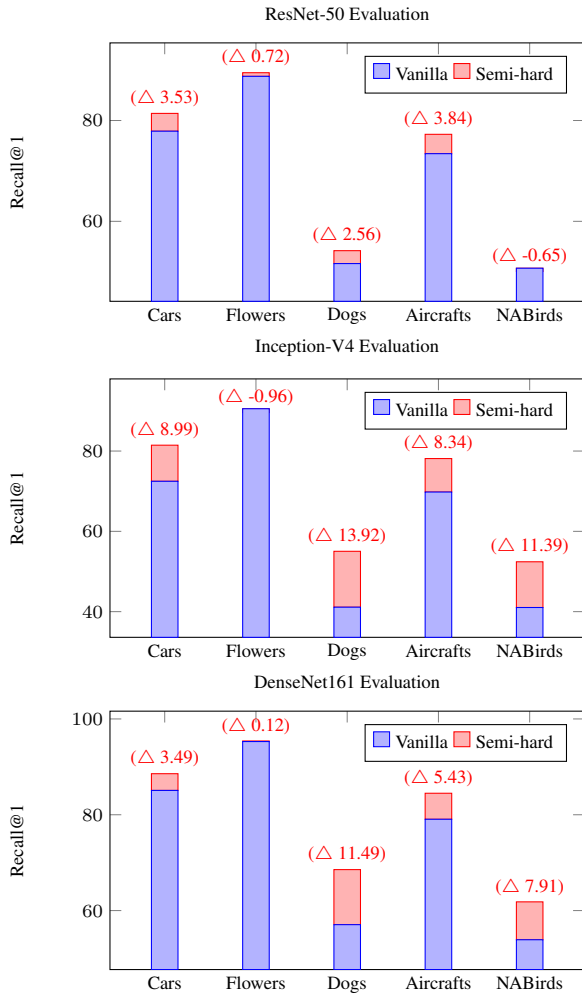

Figure S4: Comparative embedding evaluation between single-head softmax and two-head with semi-hard triplet loss using the penultimate layer in ResNet-50, Inception-V4 and DenseNet161 respectively. Triplet loss semi-hard improvements over the softmax model are reported as ( $\Delta$ ).

pairs  $(a, p)$  and their corresponding semi-hard negatives  $n$  are identified. For a fair comparison with vanilla softmax approach, only  $(b/3)$  random triplets  $(a, p, n)$  are utilized for back-propagation. This process repeats for  $N$  training iterations.

**Algorithm 1** HDD training procedure. In our experiments,  $b = \{33, 36\}$  is the mini-batch size,  $N_B = 3$  is the number of mini-batches, and  $N = 10K$  is number of training iterations.

```

for all iteration  $i$  in  $N$  do
   $S_\phi = \Phi$ 
  for all  $j$  in  $N_B$  do
    Add a random batch, of size  $b$ , to  $S_\phi$ 
  end for
  Compute action embeddings  $E_\phi$  for  $S_\phi$ 
  Compute pairwise distance matrix  $D_\phi$  using  $E_\phi$ 
   $T_{tri} = \Phi$ 
  Construct all positive pairs  $(a, p)$ 
  for all  $(a, p)$  in positive pairs do
    Find nearest semi-hard negative  $n$  using  $D_\phi$ 
    append  $(a, p, n)$  to  $T_{tri}$ 
  end for
  if  $len(T_{tri}) > b/3$  then
     $T_{tri} = \text{shuffle}(T_{tri})[0 : b/3]$ 
  end if
  //  $T_{tri}$  contains  $b$  actions
  Feed-forward  $T_{tri}$ 
  compute softmax + triplet losses and back-propagate.
end for

```

## References

- [1] A. Angelova and S. Zhu. Efficient object detection and segmentation for fine-grained recognition. In *CVPR*, 2013. 3
- [2] S. Kong and C. Fowlkes. Low-rank bilinear pooling for fine-grained classification. In *CVPR*. IEEE, 2017. 3
- [3] J. Krause, B. Sapp, A. Howard, H. Zhou, A. Toshev, T. Duerig, J. Philbin, and L. Fei-Fei. The unreasonable effectiveness of noisy data for fine-grained recognition. In *ECCV*. Springer, 2016. 3
- [4] T.-Y. Lin and S. Maji. Improved bilinear pooling with cnns. *arXiv preprint arXiv:1707.06772*, 2017. 3
- [5] M. Liu, C. Yu, H. Ling, and J. Lei. Hierarchical joint cnn-based models for fine-grained cars recognition. In *International Conference on Cloud Computing and Security*. Springer, 2016. 3
- [6] V. Ramanishka, Y.-T. Chen, T. Misu, and K. Saenko. Toward driving scene understanding: A dataset for learning driver behavior and causal reasoning. In *CVPR*, 2018. 2

- [7] F. Schroff, D. Kalenichenko, and J. Philbin. Facenet: A unified embedding for face recognition and clustering. In *CVPR*, 2015. 1
- [8] A. Sharif Razavian, H. Azizpour, J. Sullivan, and S. Carlsson. Cnn features off-the-shelf: an astounding baseline for recognition. In *Proceedings of the IEEE conference on computer vision and pattern recognition workshops*, 2014. 3
- [9] Y. Zhang, X.-S. Wei, J. Wu, J. Cai, J. Lu, V.-A. Nguyen, and M. N. Do. Weakly supervised fine-grained categorization with part-based image representation. *IEEE Transactions on Image Processing*, 2016. 3
